# Supplementary material
Source: Springer Nature journal article supplement (https://www.springermedizin.de/resource/supplementary/13075_2009_2770_MOESM3_ESM.pdf/9692850)

**A** Concentration effects of Pentosan Polysulfate (PPS) on 35S-Glycosaminoglycan (35S-GAG) biosynthesis by human MPC in 5 days micromass cultures.

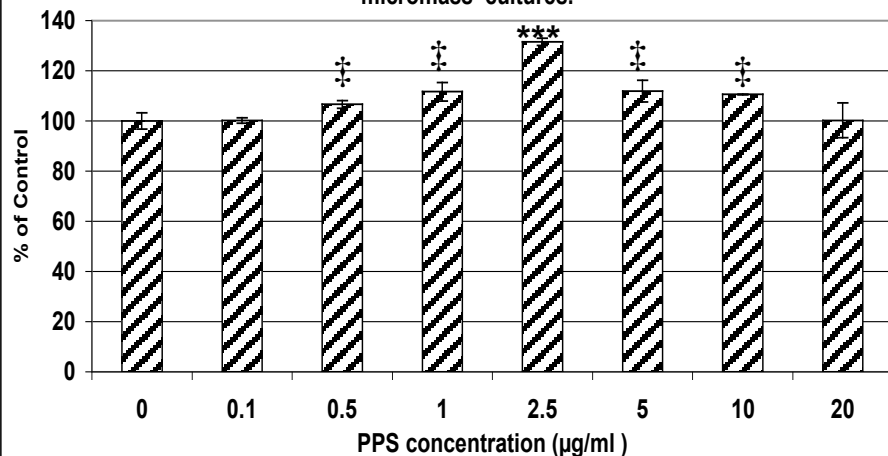

**B** Concentration effects of Heparin on 35S-Glycosaminoglycan (35S-GAG) biosynthesis by human MPC in 5 days micromass cultures.

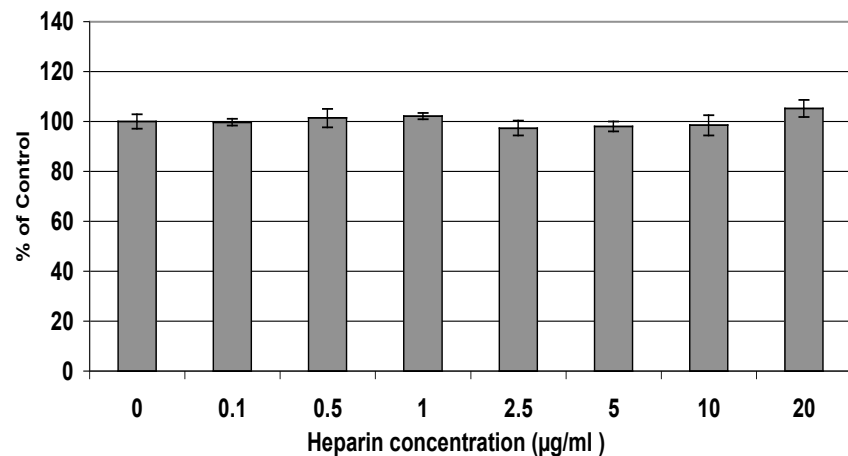

**C** Concentration effects of Hyaluronan (HA) on 35S-Glycosaminoglycan (35S-GAG) biosynthesis by human MPC in 5 days micromass cultures.

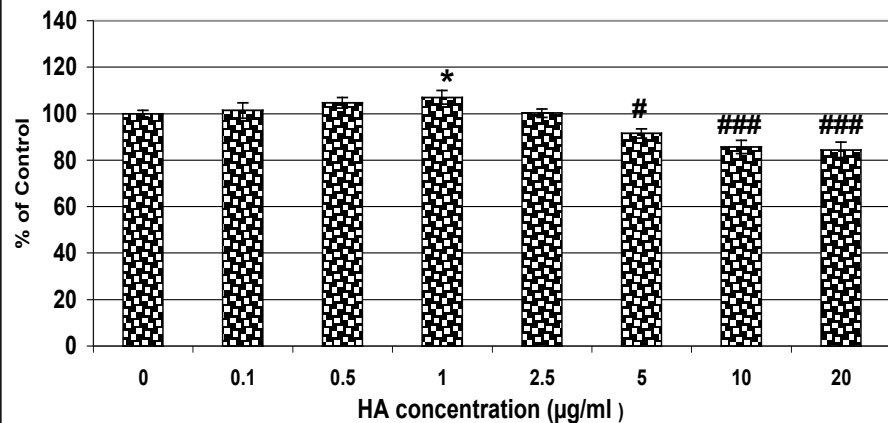

**D** Concentration effects of Dextran Sulfate (DS) on 35S-Glycosaminoglycan (35S-GAG) biosynthesis by human MPC in 5 days micromass cultures.

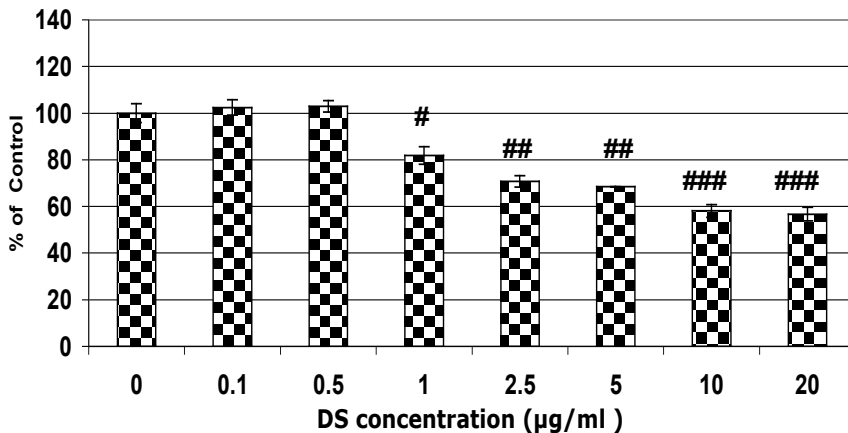

Supplement: MOESM3 [file 9692850]
